# Supplementary material for: Lead Assays with Smartphone Detection Using a Monolithic Rod with 4-(2-Pyridylazo) Resorcinol
Source: MDPI journal article supplement (doi:10.3390/molecules26185720), 2021-09-21
Supplement: s1 [file s1]

Article

# Lead Assays with Smartphone Detection Using a Monolithic Rod with 4-(2-Pyridylazo) Resorcinol

Piyanat Issarangkura Na Ayutthaya <sup>1</sup>, Chonnipa Yeerum <sup>1</sup>, Kullapon Kesonkan <sup>1</sup>, Kanokwan Kiwfo <sup>2</sup>, Kate Grudpan <sup>2,\*</sup>, Norio Teshima <sup>3</sup>, Hiroya Murakami <sup>3</sup> and Monnatpat Vongboot <sup>1,\*</sup>

<sup>1</sup> Department of Chemistry, Faculty of Science, King Mongkut's University of Technology Thonburi, Bangkok, 10140, Thailand; piyanat.tp@gmail.com (P.I.N.A.); chonnipa.yeerum@gmail.com (C.Y.); kullapon.kesonkan@gmail.com (K.K.)

<sup>2</sup> Center of Excellence for Innovation in Analytical Science and Technology and Department of Chemistry, Faculty of Sciences, Chiang Mai University, Chiang Mai, 50200, Thailand; k.kanokwan11@gmail.com

<sup>3</sup> Department of Applied Chemistry, Aichi Institute of Technology, 1247 Yachigusa, Yakusa-cho, Toyota 470-0392, Japan; teshima@aitech.ac.jp (N.T.); hmurakami@aitech.ac.jp (H.M.)

\* Correspondence: sumalee.tan@kmutt.ac.th (M.V.); Tel.: +662-470-8969, kgrudpan@gmail.com (K.G.); Tel.: +66-5394-1917

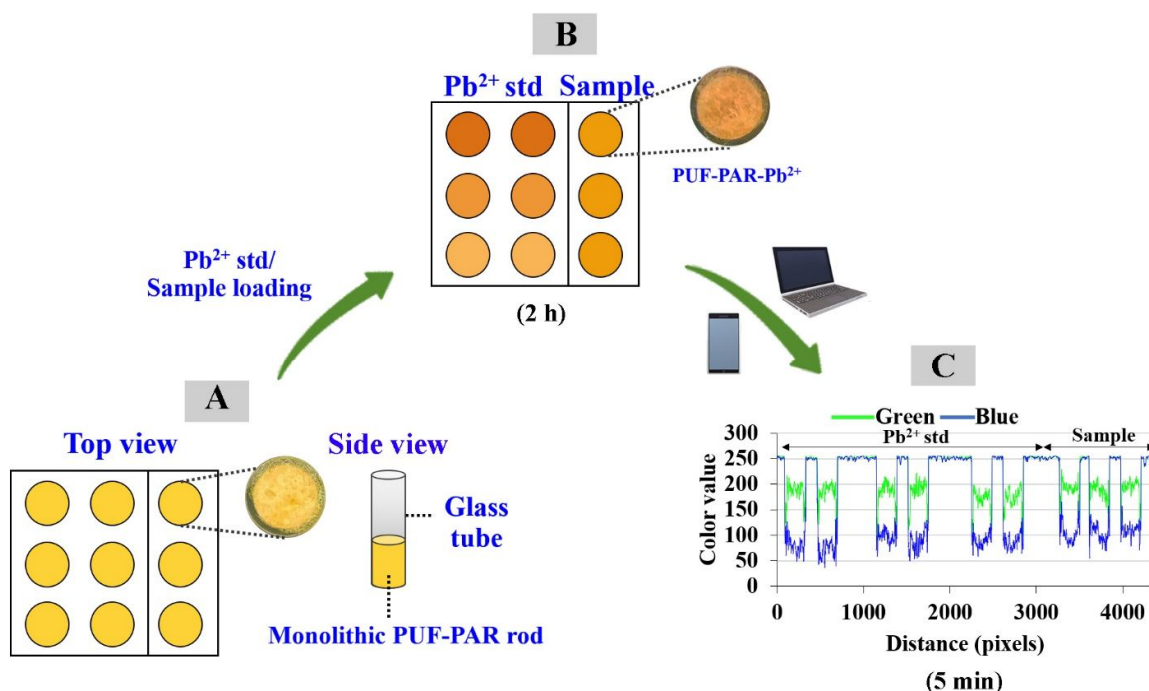

**Figure S1.** Lead assay with smartphone detection: A = ready-to-use sensor, B = detection (loading and photographing) and C = evaluation

Figure S1 illustrates lead assay with smartphone detection, including three steps of the ready-to-use sensor, detection (loading and photographing), and evaluation.
